# Supplementary material
Source: PubMed Central journal article supplement (PMC2824459)
Supplement: emboj2009350s8.pdf [file emboj2009350s8.pdf]

Manuscript EMBO-2009-71783

## **A genome-wide RNA interference screen identifies two novel components of the metazoan secretory pathway**

Franz Wendler, Alison Gillingham, Rita Sinka, Claudia Rosa-Ferreira, David Gordon, Xavier Franch-Marro, Andrew Peden, Jean-Paul Vincent, Sean Munro

*Corresponding author: Sean Munro, MRC*

---

### **Review timeline:**

Submission date:

01 July 2009

Accepted:

02 November 2009

---

### **Transaction Report:**

(Note: With the exception of the correction of typographical or spelling errors that could be a source of ambiguity, letters and reports are not edited. The original formatting of letters and referee reports may not be reflected in this compilation.)

An earlier version of this manuscript was submitted to The EMBO Journal and assessed before January 2009. As the original review of the manuscript therefore predates the implementation of The EMBO Journal's transparent review process policy, no Review Process File is available with this article
